# Supplementary material for: Soil Erosion Estimates in Arid Region: A Case Study of the Koutine Catchment, Southeastern Tunisia
Source: MDPI journal article supplement (doi:10.3390/app11156763), 2021-07-23
Supplement: s1 [file s1]

# Supplementary material

## Soil erosion estimates in arid region: A case study of Koutine catchment, Southeastern of Tunisia

Mongi Ben Zaied <sup>1,\*</sup>, Seifeddine Jomaa <sup>2</sup> and Mohamed Ouessar <sup>1</sup>

<sup>1</sup> Laboratory of Eremology and Combating Desertification (LR16IRA01), Institut des Régions Arides de Médénine, University of Gabès, Tunisia; [benzaied\\_m@yahoo.fr](mailto:benzaied_m@yahoo.fr); [ouessar.mohamed@ira.rnrt.tn](mailto:ouessar.mohamed@ira.rnrt.tn)

<sup>2</sup> Department of Aquatic Ecosystem Analysis and Management, Helmholtz Centre for Environmental Research - UFZ, Brückstrasse 3a, 39114 Magdeburg, Germany; [seifeddine.jomaa@ufz.de](mailto:seifeddine.jomaa@ufz.de)

\* Correspondence: [benzaied\\_m@yahoo.fr](mailto:benzaied_m@yahoo.fr); Tel.: +216 75 633 005

### Content of this file

**Table S1.** Particles size distribution and soil texture of samples from impluviums areas.

**Table S2.** Particles size distribution and soil texture of samples taken from different sites in the Koutine catchment.

**Table S1.** Particles size distribution and soil texture of samples from impluvium areas.

| Cistern | Location   | Slope (%) | Clay (%) | Silt (%) | Sand (%) | Texture* | Organic Matter (%) |
|---------|------------|-----------|----------|----------|----------|----------|--------------------|
| M5      | Upstream   | 30        | 11.8     | 13.0     | 75.1     | SL       | 0.77               |
| M14     | Upstream   | 6         | 13.8     | 6.7      | 77.9     | SL       | 0.83               |
| F2      | Upstream   | 10        | 4.7      | 1.5      | 91.9     | S        | 0.95               |
| M19     | Upstream   | 17        | 30.8     | 3.2      | 65.1     | SCL      | 1.07               |
| M7      | Upstream   | 15        | 13.8     | 10.0     | 75.7     | SL       | 1.37               |
| M18     | Upstream   | 22        | 27.3     | 0.0      | 72.0     | SL       | 1.55               |
| M4      | Upstream   | 14        | 4.5      | 6.0      | 88.6     | S        | 1.67               |
| M6      | Upstream   | 11        | 12.0     | 29.5     | 56.7     | SL       | 1.84               |
| M2      | Upstream   | 7         | 8.7      | 3.5      | 86.7     | LS       | 1.90               |
| M3      | Upstream   | 2         | 6.5      | 2.8      | 89.2     | S        | 2.02               |
| M8      | Downstream | 2         | 3.8      | 9.2      | 86.2     | LS       | 0.18               |
| M10     | Downstream | 3         | 11.8     | 6.5      | 80.6     | SL       | 0.54               |
| M9      | Downstream | 2         | 12.7     | 10.7     | 75.7     | SL       | 0.65               |
| F3      | Downstream | 3         | 9.7      | 2.8      | 85.5     | LS       | 0.65               |
| F5      | Downstream | 6         | 5.7      | 2.0      | 91.7     | S        | 0.95               |
| F6      | Downstream | 5         | 3.8      | 0.0      | 94.5     | S        | 1.13               |
| M11     | Downstream | 5         | 12.0     | 12.2     | 75.3     | SL       | 1.31               |
| M13     | Middle     | 3         | 8.0      | 0.3      | 90.6     | S        | 0.54               |
| M12     | Middle     | 2         | 8.8      | 4.8      | 85.1     | LS       | 0.65               |
| F4      | Middle     | 3         | 10.2     | 1.5      | 87.1     | LS       | 1.01               |
| M17     | Middle     | 2         | 32.2     | 11.8     | 54.7     | SL       | 1.19               |
| F1      | Middle     | 5         | 8.0      | 6.2      | 85.1     | LS       | 1.37               |
| M15     | Middle     | 2         | 21.0     | 0.0      | 77.6     | SL       | 1.61               |
| M16     | Middle     | 5         | 24.8     | 6.5      | 67.4     | SL       | 1.84               |
| M1      | Middle     | 5         | 10.2     | 0.0      | 89.0     | LS       | 1.90               |

\*Where: SL: Sandy Loam, S: Sandy, SCL: Sandy Clay Loam and LS: Loamy Sand.

**Table S2.** Particles size distribution and soil texture of samples taken from different sites in the Koutine catchment.

| Sample | Location   | Slope (%) | Clay (%) | Silt (%) | Sand (%) | Texture* |
|--------|------------|-----------|----------|----------|----------|----------|
| E2     | Upstream   | 2.1       | 14.5     | 2.5      | 82.5     | SL       |
| E3     | Upstream   | 3.2       | 9.5      | 2.5      | 87.3     | LS       |
| E4     | Upstream   | 3.2       | 14.5     | 2.5      | 82.9     | SL       |
| E5     | Upstream   | 3.5       | 7.0      | 27.5     | 64.2     | SL       |
| E6     | Upstream   | 2.7       | 7.0      | 10.0     | 81.6     | LS       |
| E7     | Upstream   | 2.5       | 14.5     | 5.0      | 79.4     | SL       |
| E8     | Upstream   | 2.1       | 14.5     | 5.0      | 80.5     | SL       |
| E9     | Upstream   | 6.2       | 17.0     | 7.5      | 73.9     | SL       |
| E10    | Middle     | 5.6       | 9.5      | 5.0      | 84.7     | LS       |
| E11    | Middle     | 5.7       | 14.5     | 7.5      | 77.3     | SL       |
| E12    | Upstream   | 2.1       | 12.0     | 5.0      | 82.6     | LS       |
| E13    | Downstream | 0.5       | 14.5     | 0.0      | 84.5     | SL       |
| E14    | Downstream | 0.4       | 7.0      | 0.0      | 92.7     | S        |
| E15    | Downstream | 0.3       | 4.5      | 2.5      | 92.6     | S        |
| E16    | Downstream | 0.2       | 9.5      | 2.5      | 88.0     | LS       |
| E17    | Downstream | 0.3       | 12.0     | 5.0      | 82.8     | LS       |
| E18    | Downstream | 0.9       | 7.0      | 0.0      | 92.5     | S        |
| E19    | Downstream | 0.5       | 9.5      | 0.0      | 90.3     | S        |
| E20    | Middle     | 3.8       | 12.0     | 7.5      | 79.7     | SL       |
| E21    | Middle     | 1.2       | 12.0     | 2.5      | 85.2     | LS       |
| E22    | Downstream | 0.3       | 7.0      | 5.0      | 86.5     | LS       |
| E23    | Middle     | 0.5       | 14.5     | 7.5      | 77.7     | SL       |
| E24    | Downstream | 0.4       | 14.5     | 7.5      | 78.0     | SL       |
| E25    | Middle     | 0.5       | 14.5     | 5.0      | 80.2     | SL       |
| E26    | Downstream | 0.4       | 12.0     | 10.0     | 76.0     | SL       |
| E27    | Upstream   | 3.9       | 16.8     | 11.0     | 71.8     | SL       |
| E28    | Upstream   | 4.0       | 10.2     | 6.8      | 81.7     | LS       |
| E29    | Upstream   | 5.3       | 14.5     | 10.0     | 74.2     | SL       |
| E30    | Middle     | 4.3       | 14.5     | 0.0      | 85.2     | LS       |
| E31    | Middle     | 4.1       | 9.5      | 2.5      | 86.8     | LS       |
| E32    | Middle     | 1.0       | 9.5      | 2.5      | 87.6     | LS       |
| E33    | Middle     | 3.9       | 17.0     | 5.0      | 77.5     | SL       |
| E34    | Downstream | 0.2       | 8.5      | 1.5      | 89.9     | S        |
| E35    | Upstream   | 2.6       | 14.5     | 29.8     | 55.6     | SL       |
| E36    | Upstream   | 4.7       | 10.3     | 7.8      | 81.9     | LS       |
| E37    | Middle     | 0.5       | 5.3      | 5.7      | 87.6     | LS       |
| E38    | Upstream   | 5.1       | 4.7      | 2.5      | 91.7     | S        |

\*Where: SL: Sandy Loam, S: Sandy, SCL: Sandy Clay Loam and LS: Loamy Sand.
